# Supplementary material
Source: PubMed Central journal article supplement (PMC2727268)
Supplement: kwn260_1.pdf [file kwn260_1.pdf]

**Web Appendix 1.** Distributions of Number of City Districts and Samples by Province

| Provinces    | No. of Cities | No. of City Districts | No. of Samples | Provinces | No. of Cities | No. of City Districts | No. of Samples |
|--------------|---------------|-----------------------|----------------|-----------|---------------|-----------------------|----------------|
| Beijing      | 1             | 12                    | 255            | Jiangxi   | 8             | 22                    | 70             |
| Tianjin      | 1             | 13                    | 137            | Shandong  | 9             | 31                    | 320            |
| Hebei        | 6             | 17                    | 70             | Henan     | 8             | 40                    | 156            |
| Shanxi       | 7             | 13                    | 85             | Hubei     | 8             | 46                    | 347            |
| Liaoning     | 7             | 39                    | 439            | Hunan     | 13            | 42                    | 208            |
| Jilin        | 9             | 31                    | 230            | Guangdong | 10            | 30                    | 242            |
| Heilongjiang | 12            | 46                    | 250            | Guangxi   | 10            | 48                    | 680            |
| Shanghai     | 1             | 19                    | 543            | Chongqing | 1             | 24                    | 209            |
| Jiangsu      | 11            | 53                    | 944            | Sichuan   | 15            | 53                    | 703            |
| Zhejiang     | 11            | 54                    | 769            | Shaanxi   | 6             | 22                    | 134            |
| Anhui        | 9             | 40                    | 273            |           |               |                       |                |
| Fujian       | 9             | 40                    | 294            | Total     | 171           | 735                   | 7,358          |

**Web Appendix 2.** API Definition and Classification

The National Environmental Monitoring Center, China, collects information to construct API based on the following pollutant concentrations: SO<sub>2</sub>, NO<sub>2</sub>, and inhalable particulates (including PM<sub>10</sub>, CO, and O<sub>3</sub>). A sub-API is calculated daily for each pollutant concentration according to the criteria shown in Table A. Then the maximum of all sub-APIs is taken as the daily API of the city. The yearly API, which is the average of daily APIs for a given year, is released by the Ministry of Environmental Protection of China, which classifies air quality into seven categories based on the yearly API with a score from 1 to 7: Excellent (API 0-50), good (API 51-100), slightly polluted (API 101-150), light polluted (API 151-200), moderately polluted (API 201-250), moderately heavily polluted (API 251-300), and heavily polluted (API>300). Please refer <http://www.sepa.gov.cn/english/airqualityinfo.htm> for more information.

Table A. The API value and corresponding pollutant concentrations

| Air Pollution Index | Pollutant Concentrations ( mg/cubic meter ) |                                    |                                     |                        |                                    |
|---------------------|---------------------------------------------|------------------------------------|-------------------------------------|------------------------|------------------------------------|
|                     | SO <sub>2</sub><br>(daily average)          | NO <sub>2</sub><br>(daily average) | PM <sub>10</sub><br>(daily average) | CO<br>(hourly average) | O <sub>3</sub><br>(hourly average) |
| 50                  | 0.050                                       | 0.080                              | 0.050                               | 5                      | 0.120                              |
| 100                 | 0.150                                       | 0.120                              | 0.150                               | 10                     | 0.200                              |
| 200                 | 0.800                                       | 0.280                              | 0.350                               | 60                     | 0.400                              |
| 300                 | 1.600                                       | 0.565                              | 0.420                               | 90                     | 0.800                              |
| 400                 | 2.100                                       | 0.750                              | 0.500                               | 120                    | 1.000                              |
| 500                 | 2.620                                       | 0.940                              | 0.600                               | 150                    | 1.200                              |

### Web Appendix 3. Regression Models

#### (1) Two-level linear regression models

The two-level linear regression models employed in this study for IADL difficulty and cognitive impairment can be summarized as the following simultaneous equations:

$$Y_{ij} = \beta_{0j} + \sum_{q=1}^Q \beta_{qj} X_{qij} + e_{ij} \text{ (at the individual-level)}$$

$$\beta_{0j} = \gamma_{00} + \sum_{s=1}^S \gamma_{0s} W_{sj} + u_{oj} \text{ and } \beta_{qj} = \gamma_{q0} \text{ (at the city district-level)}$$

Where,  $j=1, \dots, J$  ( $J=735$ ) is the code number of city districts;  $i=1, \dots, n_j$  is the code number of the individuals in Unit  $j$ ;  $Y_{ij}$  is the dependent variable of either IADL difficulty or cognitive impairment;  $\beta_{qj}$  ( $q=0,1,\dots,Q$ ) is individual-level coefficients;  $Q$  is the total number of control variables at the individual level;  $X_{qij}$  refers to individual-level variable  $q$  for individual  $i$  in city district  $j$ ;  $e_{ij}$  is the individual-level random effect;  $\gamma_{0s}$  ( $s=0,1,\dots,S$ ) and  $\gamma_{q0}$  are city district-level coefficients;  $S$  is the total number of city district-level variables;  $W_{sj}$  refers to city district-level variable  $s$  for unit  $j$ ;  $u_{oj}$  is the city district-level random effect.

#### (2) Two-level logistic regression models

The two-level logistic regression models employed in this study for ADL difficulty and poor self-rated health can be summarized as the following simultaneous equations:

$$\log \left[ \frac{\phi_{ij}}{1 - \phi_{ij}} \right] = \beta_{0j} + \sum_{q=1}^Q \beta_{qj} X_{qij} + e_{ij} \text{ (at the individual-level)}$$

$$\beta_{0j} = \gamma_{00} + \sum_{s=1}^S \gamma_{0s} W_{sj} + u_{oj} \text{ and } \beta_{qj} = \gamma_{q0} \text{ (at the city district-level)}$$

Where,  $\phi_{ij}$  is the probability for having ADL difficulty or poor self-rated health for individual  $i$  in city district  $j$ ; all other symbols have the same meanings as defined above.

**Web Appendix 4.** The Average Level of API by City District GDP per Capita

---

| <u>GDP per capita</u> | <u>Mean of API</u> | <u>S. D.</u> | <u># of Districts</u> |
|-----------------------|--------------------|--------------|-----------------------|
| Low                   | 3.25               | 1.02         | 105                   |
| Medium                | 3.57               | 1.26         | 332                   |
| High                  | 3.47               | 1.15         | 298                   |

---

P-value of the ANOVA F-test: .062

Reference

Raudenbush S, Bryk A, Cheong YF., et al. *HLM: Hierarchical Linear and Nonlinear Modeling*.

Scientific Software International, Inc.: Lincolnwood, IL; 2004.
